# Supplementary material for: Back to basics: using goal setting to enhance rehabilitation
Source: MDPI journal article supplement (doi:10.3390/md20060389), 2008-07-01
Supplement: s1 [file s1]

# Updated trends on the biodiscovery of new marine natural products from invertebrates

Ricardo Calado, Renato Mamede, Sónia Cruz and Miguel C. Leal

## Supplementary Material

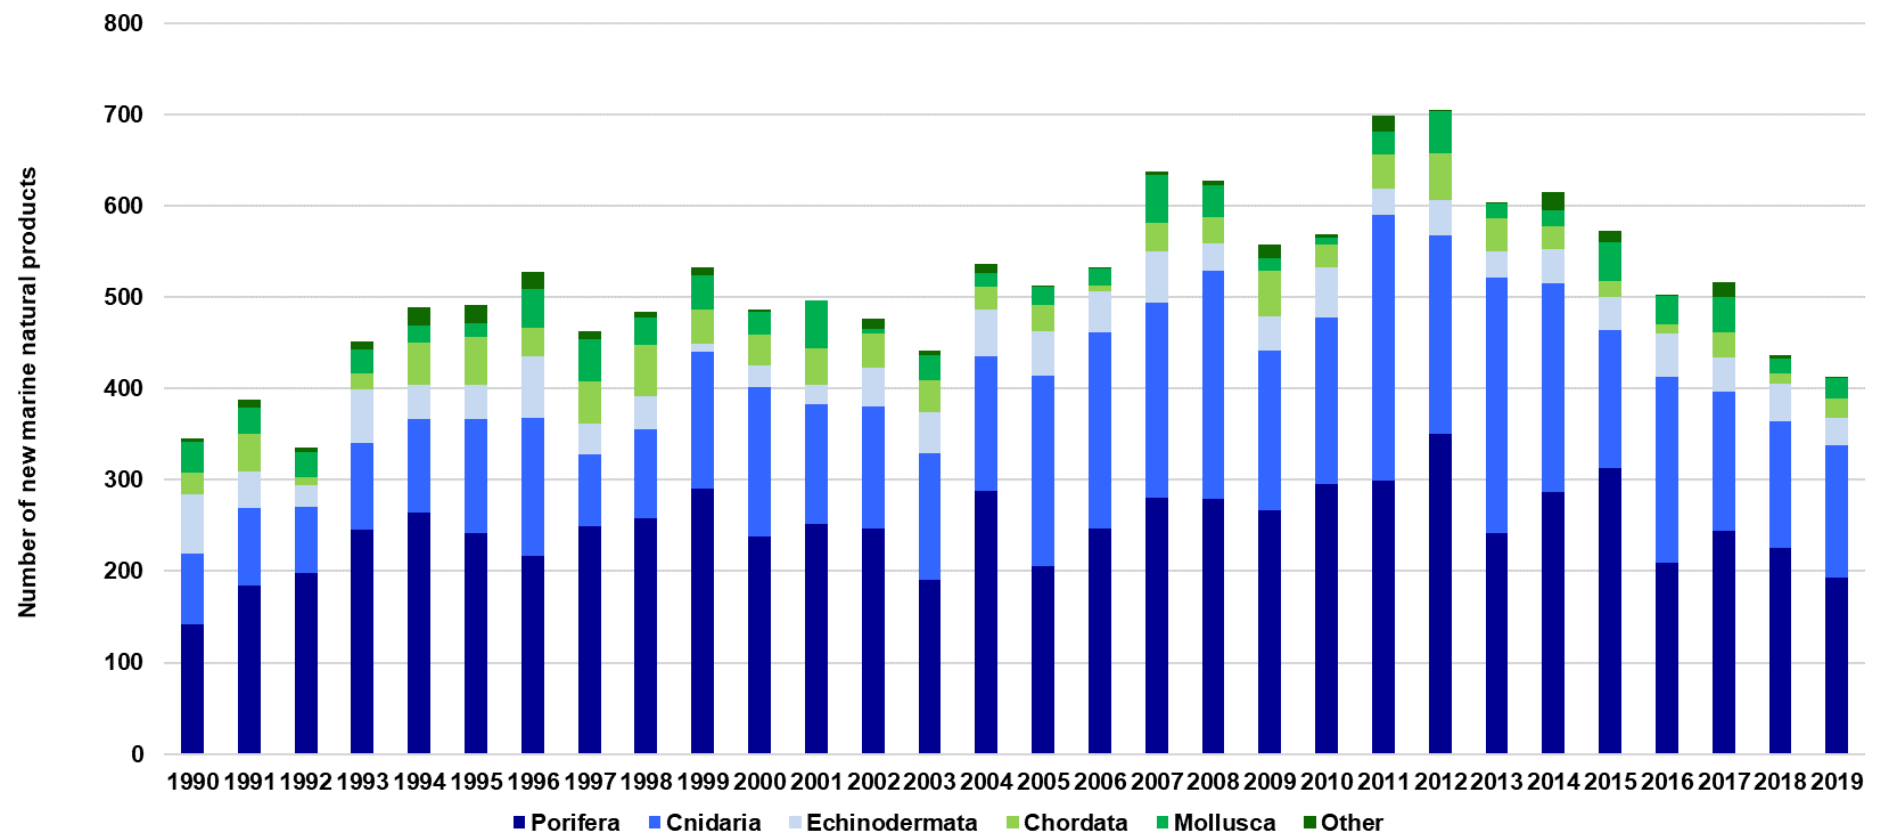

**Figure S1:** Number of new marine natural products from invertebrates discovered between 1990 and 2019 (Chordata solely refers to tunicates; “Other” refer to phyla Annelida, Bryozoa, Arthropoda, Brachiopoda, Hemichordata and Platyhelminthes).
